# Supplementary material
Source: PubMed Central journal article supplement (PMC5579353)
Supplement: EMBJ-36-2510-s001.pdf [file EMBJ-36-2510-s001.pdf]

## Expanded View Figures

### Figure EV1. YAP and TEAD directly promote Skp2 transcription in response to mechanical cues.

- A Immunoblots with the indicated antibodies. At the indicated time points, whole-cell lysates were taken from MCF10A cells transfected with the indicated siRNAs and treated with MG132 (10  $\mu$ M).
- B Immunoblots of MDA-MB-468 cells infected with retroviruses encoding an empty vector (Vec) or the indicated YAP mutant clones.
- C Immunoblots of HeLa cells transduced with flag 5SA-YAP via retroviral infection.
- D Immunoblots of RPE1 (above) or MCF10A cells (below) stably expressing vector or 5SA-YAP and incubated with cyclohexamide (CHX) for the indicated times. Relative Skp2 immunoblot band intensity normalized to  $\beta$ -actin is also shown for MCF10A cells.
- E Relative mRNA levels of the indicated genes, as determined by qPCR, from MDA-MB-231 cells transfected with control siRNAs or TEAD1/3/4-specific siRNAs. Data were collected from seven independent experiments ( $N = 7$ ).
- F MDA-MB-231 cells were transfected with control siRNAs or TEAD1/3/4-specific siRNAs. After 48 h, the cells were treated with MG132 (10  $\mu$ M). Shown are immunoblots from whole-cell lysates prepared at the indicated times with the indicated antibodies.
- G Using the UCSC genome browser, we compared our own ChIP-seq results with those of two published reports (Galli *et al*, 2015; Stein *et al*, 2015). We looked specifically at well-known YAP targets including AMOTL2, CTGF, ANKRD1, Cyr61, KIBRA, TEAD4, and LATS2.
- H Relative Skp2 and CTGF mRNA levels, as measured by qPCR, in MCF10A cells stably expressing vector or 5SA-YAP and treated with Y27632 (20  $\mu$ M, 14 h) or not ( $N = 3$ ).
- I Enrichment of endogenous YAP at TB2 in the Skp2 promoter in MCF10A cells cultured as sparse or highly dense monolayers, as determined by ChIP-qPCR. The CTGF promoter (prmt) and the genomic region 3' of the CTGF gene were used as positive (pos.ctl) and negative controls (neg.ctl), respectively ( $N = 2$ ).

Data information: All error bars indicate s.e.m. Statistical significance, as determined by a two-tailed  $t$ -test, is indicated above each bar.

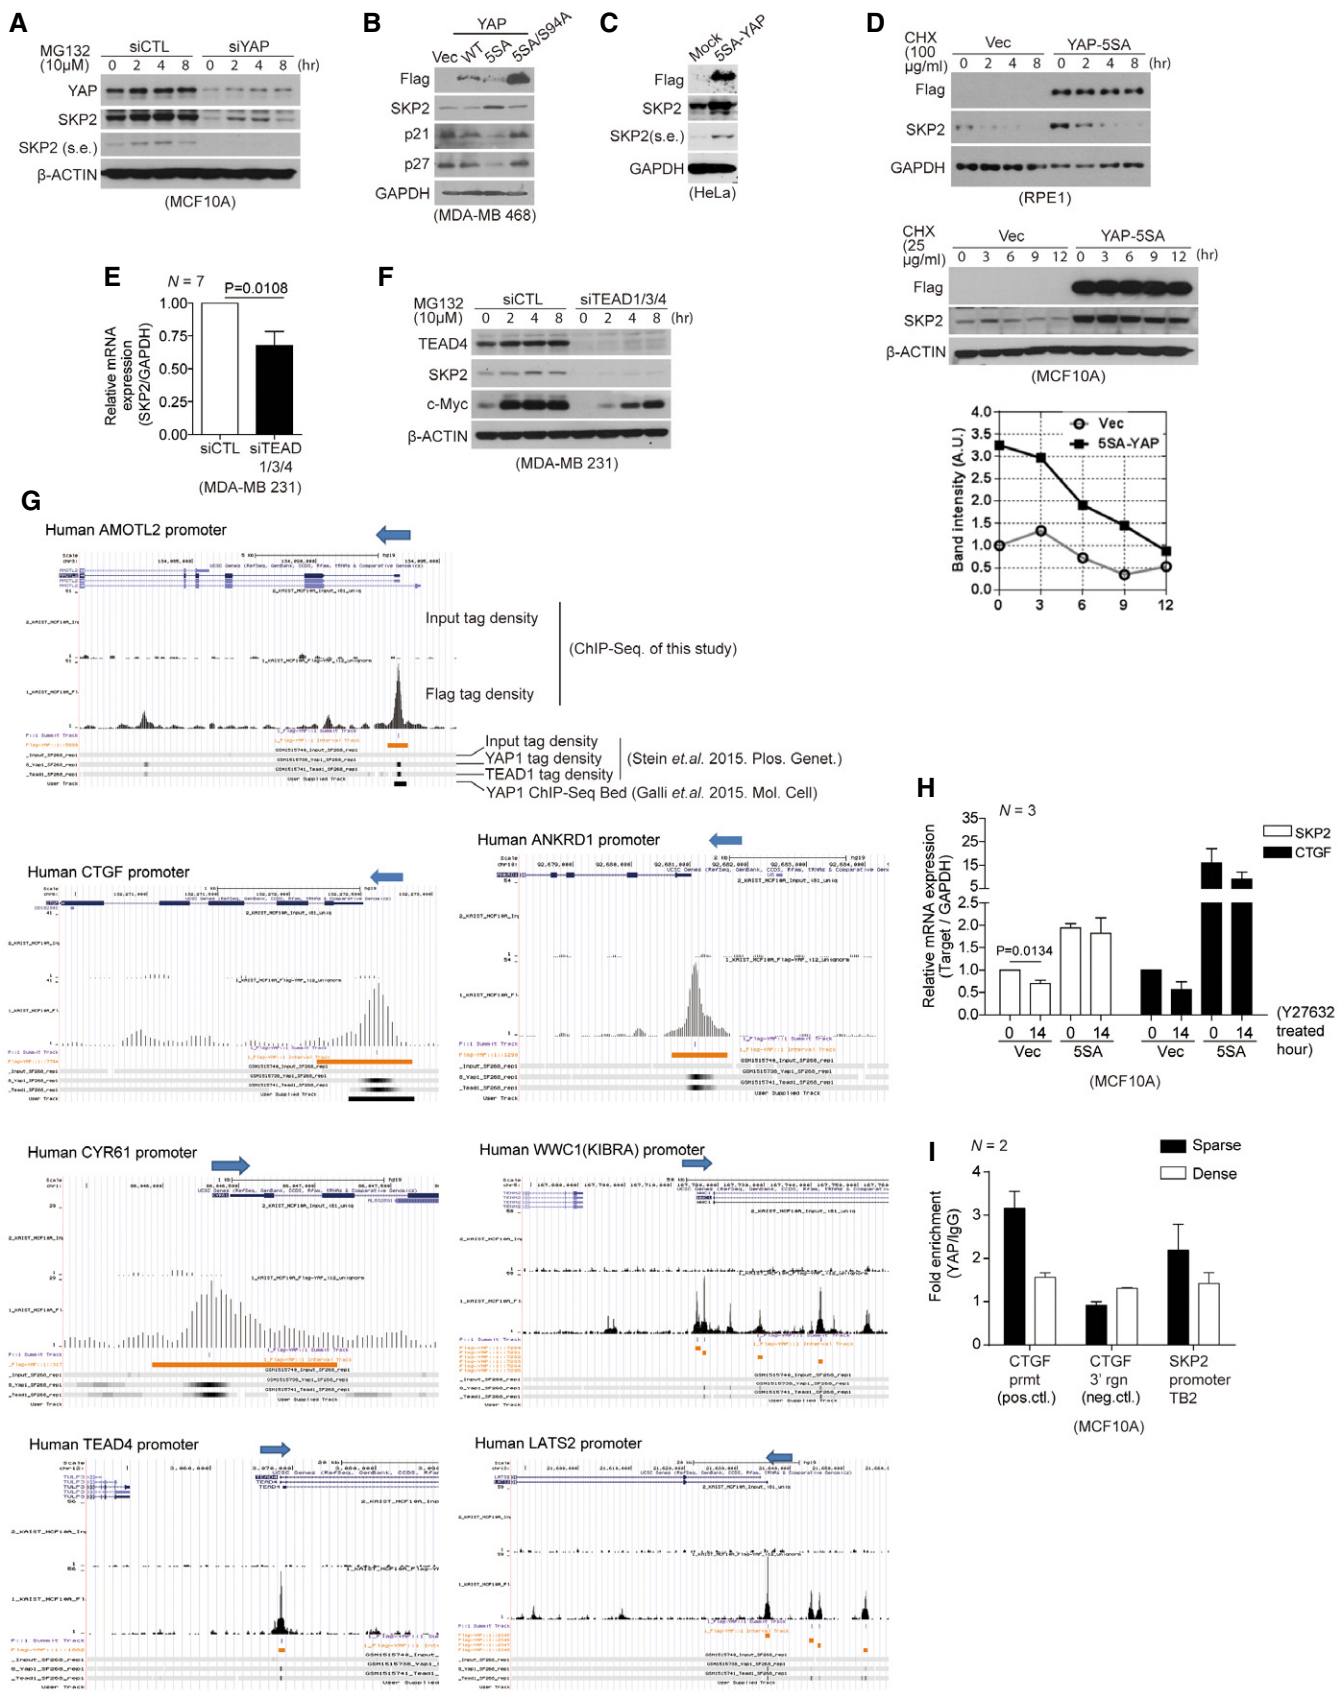

Figure EV1.

**Figure EV2. Inactivation of Skp2 does not effectively suppress YAP-driven cell cycle control in a 2D culture system.**

- A Using the CRISPR-Cas9 system, we generated control or Skp2 knockout MCF10A clones. These were further manipulated to generate the doxycycline-inducible 5SA-YAP expression system (Tet-ON: 5SA-YAP). Immunoblots confirmed both the Skp2 knockout and the function of the inducible 5SA-YAP expression system.
- B (Above) Experimental protocol schematic. (Below) Cells prepared as in (A) were treated with or without doxycycline for 2 days. Then, cells were either serum-starved or not in the absence or presence of 2 days of doxycycline. After 1 h of BrdU incorporation, the BrdU-positive cells were counted. > 500 cells were analyzed in each of three independent experiments.
- C (Above) Experimental protocol schematic. Doxycycline-inducible 5SA-YAP-expressing MCF10A cells were either serum-starved or not. After 2 days, some cells were fixed and others were treated with doxycycline. After an additional 2 days, the cells were fixed and stained with a Ki67-specific antibody and DAPI.
- D Immunoblots of cells treated as in (C).
- E Quantification of Ki67 positivity among cells treated as in (C). > 300 cells were analyzed for each of two independent experiments.
- F Doxycycline-inducible 5SA-YAP-expressing MDA-MB-231 cells treated as in (C) except for an additional 1 h of BrdU incorporation. > 300 cells were analyzed for each of two independent experiments.
- G MCF10A cells were infected with lentiviruses encoding either vector or Skp2. The cells were then serum-starved for 2 days to induce cell cycle exit. After 1 h BrdU incorporation, the cells were fixed and stained with BrdU- or Ki67-specific antibodies. (Left) Representative cells stained for BrdU and counterstained with DAPI. Scale bars: 50  $\mu\text{m}$ . (Right) Quantification of BrdU- or Ki67-positive cells. > 800 cells were analyzed in each of three independent experiments.
- H RPE1 cells were treated with DMSO or SZL P1-41. After 48 h, cells were fixed and stained with a p27-specific antibody and DAPI. Scale bars: 20  $\mu\text{m}$ .
- I (Left) Experimental protocol schematic. Doxycycline-inducible 5SA-YAP-expressing cells were grown on 3D Matrigel for acinus formation. After arresting acinar growth 8 days later, one group was fixed and the other two were treated with or without doxycycline for 3 days before also being fixed. (Right) All fixed samples were visualized and quantified using phase contrast microscopy and the ImageJ program. Orange bars indicate the median. > 200 acini were analyzed for each of two independent experiments.

Data information: All error bars indicate s.e.m. Statistical significance, as determined by a two-tailed t-test, is indicated in the graph. N.S. indicates non-significance.

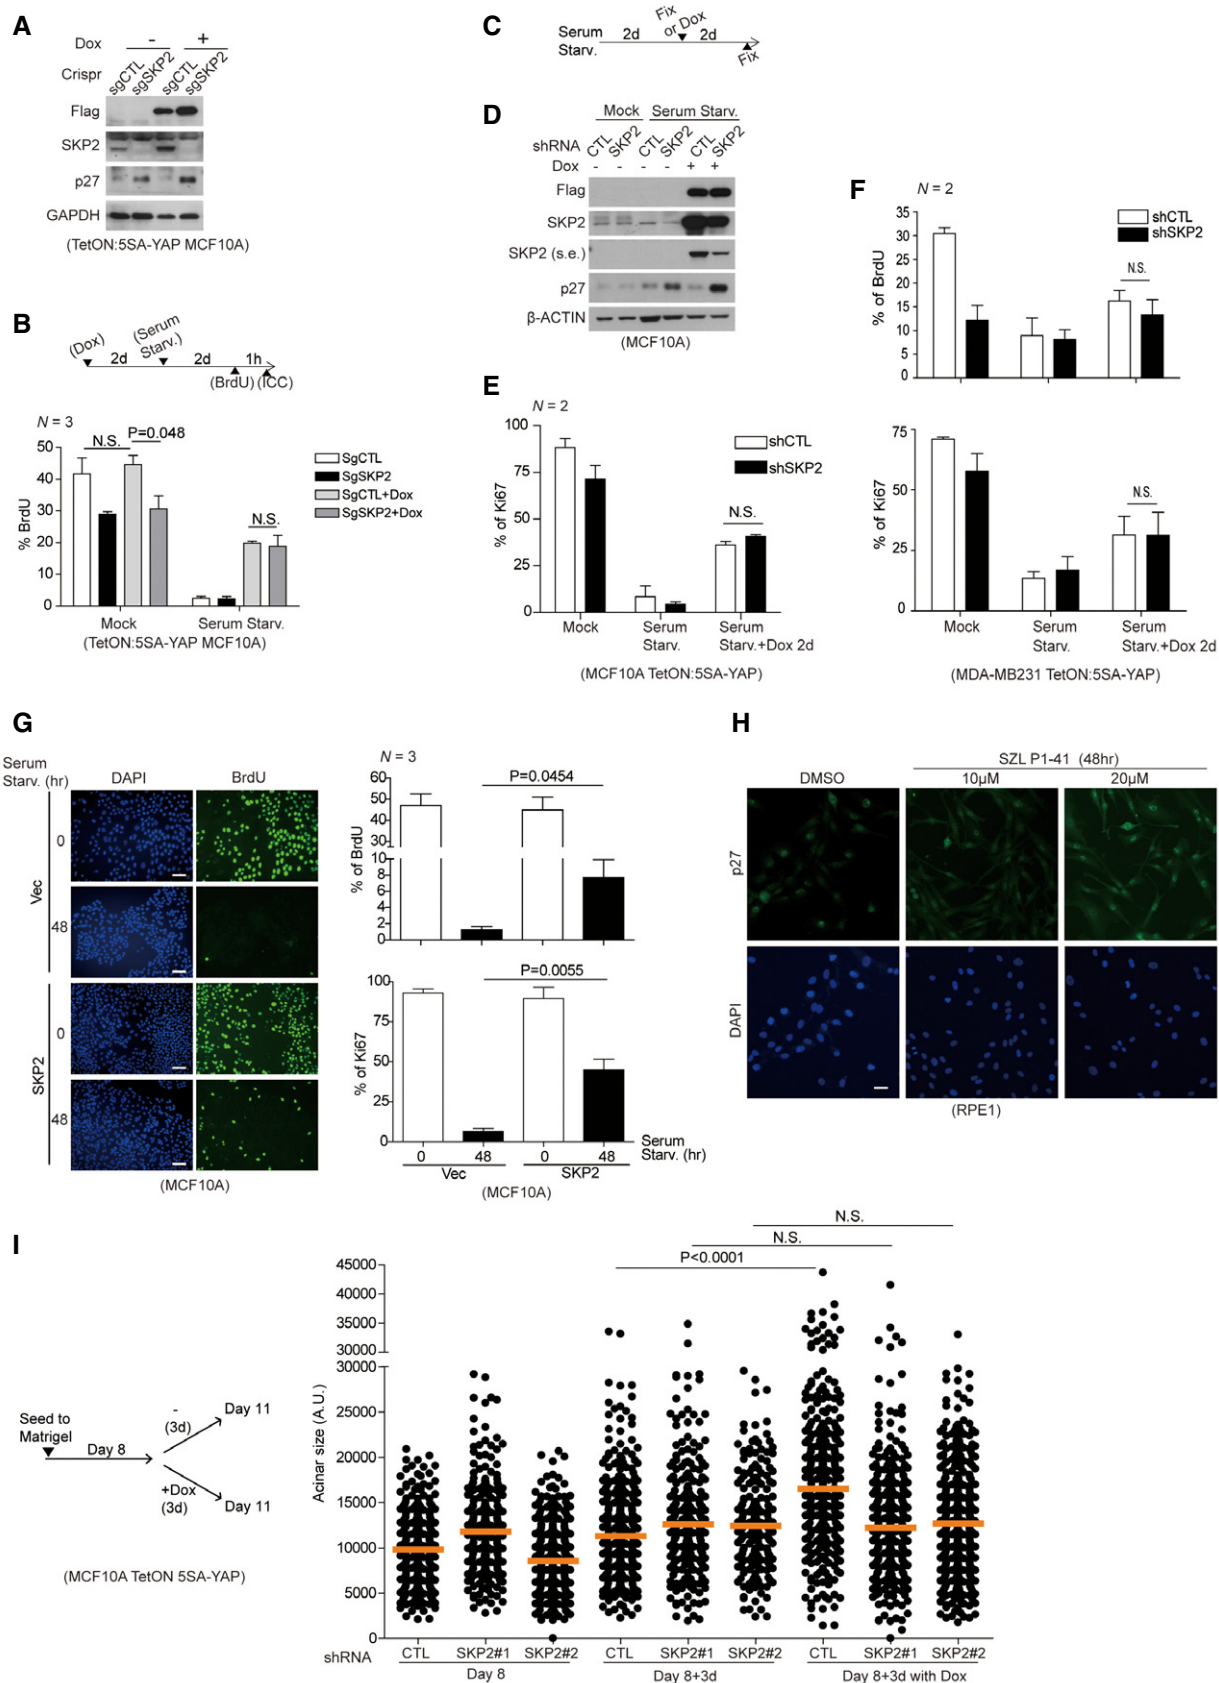

Figure EV2.

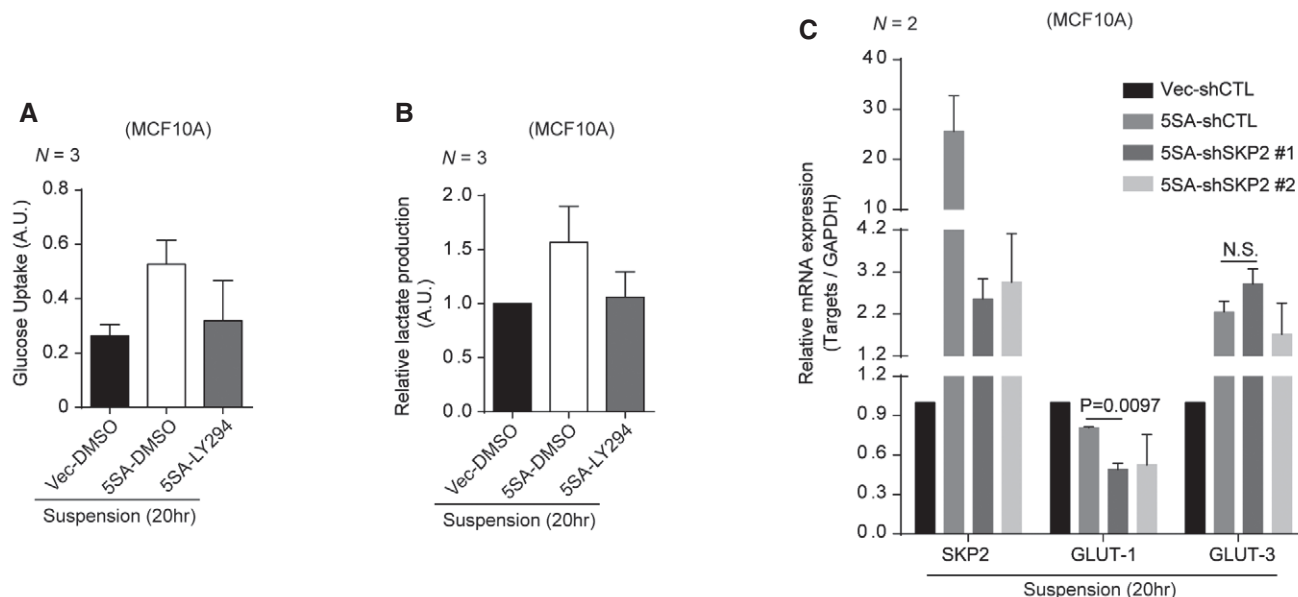

**Figure EV3. YAP-Skp2 axis affects aerobic glycolysis.**

A, B MCF10A cells expressing vector or 5SA-YAP were suspended with DMSO or LY294002 (50  $\mu$ M) treatment. After 20 h, glucose uptake (A) and lactate production (B) were measured in the indicated cells.  
 C Relative mRNA levels for the indicated genes in suspended MCF10A cells expressing control and 5SA-YAP with the indicated shRNA lentiviruses, as measured by qPCR.

Data information: All error bars indicate s.e.m. Statistical significance, as determined by a two-tailed *t*-test, is indicated in the graph.

**Figure EV4. Skp2 inactivation effectively suppresses YAP-driven aberrant stiff 3D matrix-evoked epithelial tissue behaviors.**

A MCF10A cells were embedded in soft or stiff 3D BM/COL1 gels. After 8 days of growth, the cells were fixed and stained with phalloidin and a YAP-specific antibody. DAPI was used as a nuclear counterstain. Images were taken by confocal microscopy. Scale bars: 50  $\mu$ m.  
 B Relative mRNA levels for the indicated genes in MCF10A cells treated as in (A), as measured by qPCR. Error bars indicate standard error of the mean (s.e.m.) for four independent experiments. Statistical significance, as determined by a two-tailed *t*-test, is indicated in the graph. N.S. indicates non-significance.  
 C Vector or 5SA-YAP-expressing MCF10A cells infected by the indicated shRNA lentiviruses were embedded in soft or stiff 3D BM/COL1 gels. After 7–8 days of growth, the cells were imaged by phase contrast (gray) or confocal microscopy (blue: DAPI). Scale bars: black, 100  $\mu$ m; white, 50  $\mu$ m.  
 D Empty vector- or 5SA-YAP-expressing MCF10A cells were embedded in stiff 3D BM/COL1 gels. After 7–8 days of growth, the cells were treated as in (A). Scale bars: 50  $\mu$ m.  
 E Vector- or 5SA-YAP-expressing MCF10A cells were embedded with either DMSO or the Skp2 inhibitor SZL P1-41 (20  $\mu$ M) in soft or stiff 3D BM/COL1 gels. After 7–8 days of growth, the cells were fixed and imaged by phase contrast microscopy. Images are representative of three independent experiments. Scale bars: 100  $\mu$ m.

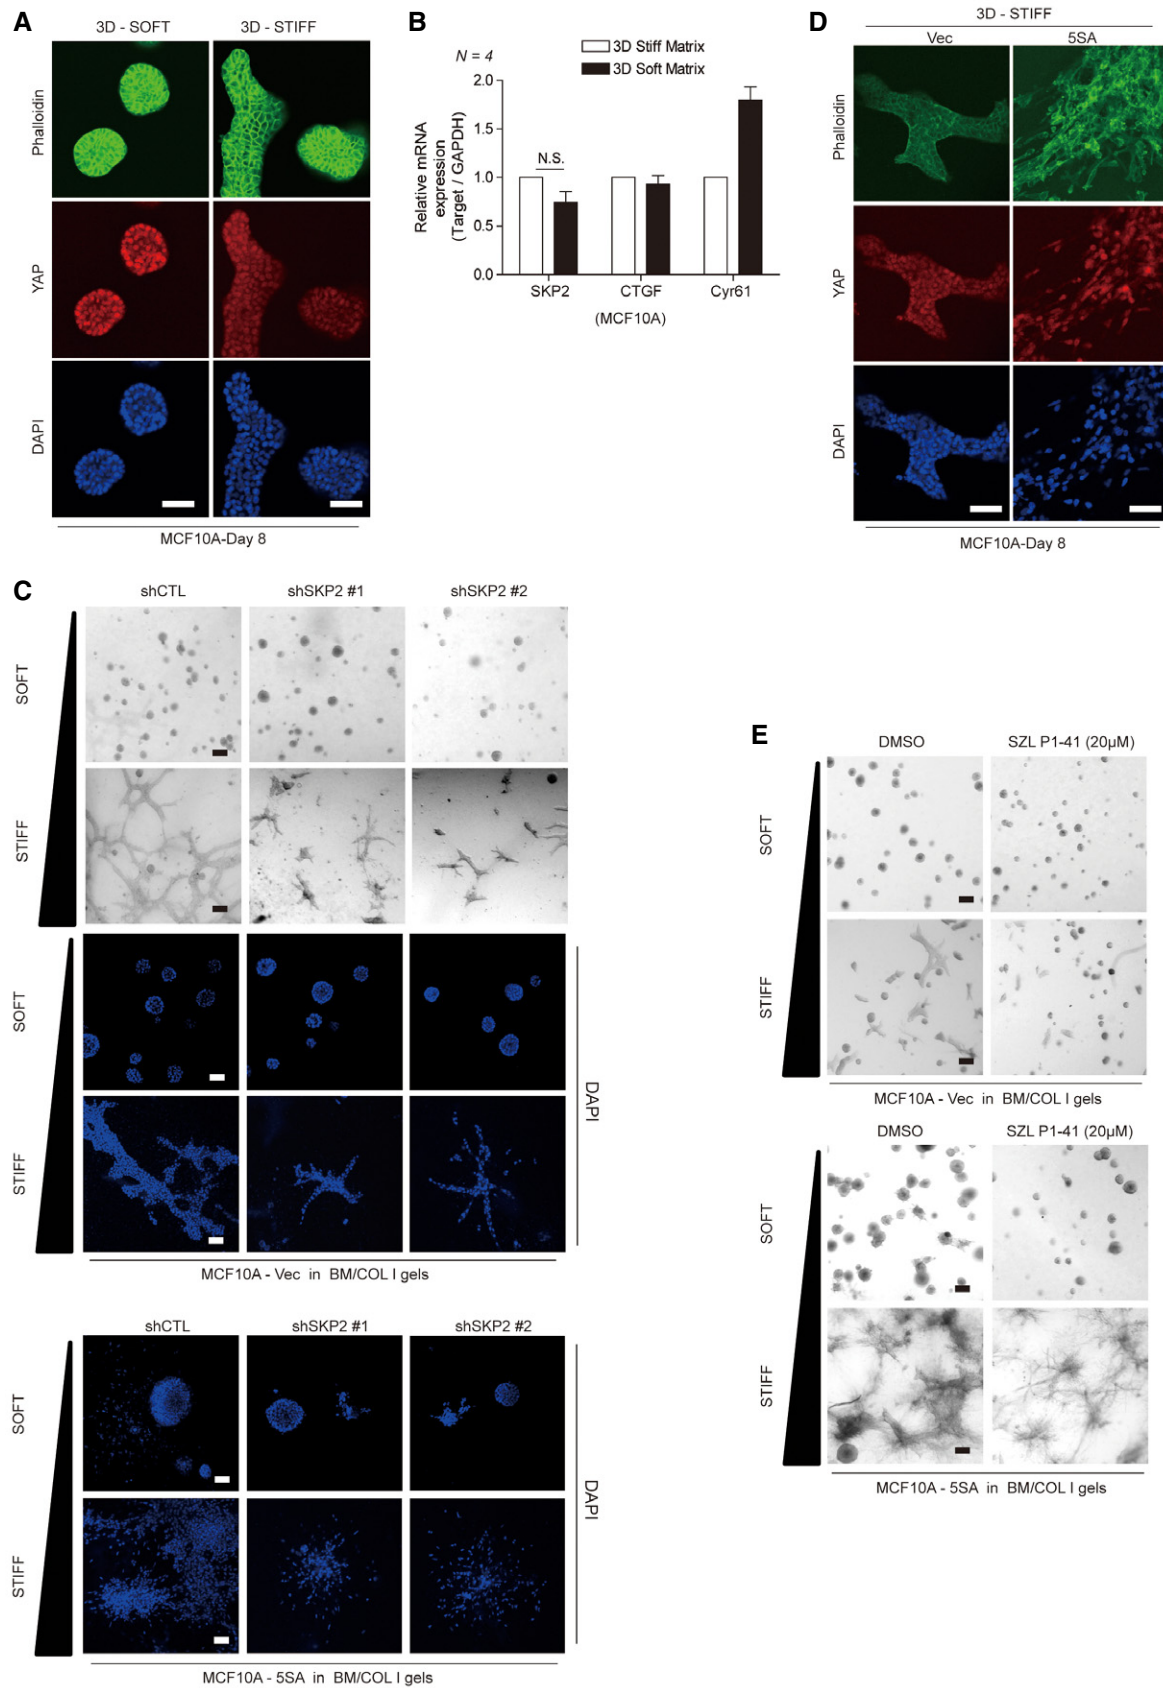

Figure EV4.

**Figure EV5. Positive correlation of YAP and Skp2 expression in breast cancer patients.**

- A Scatter plot comparing Skp2 and YAP1 mRNA expression in breast cancer patient microarray data.  $r$  = Pearson's correlation coefficient.
- B Summary and statistical analysis of the correlation between YAP and Skp2 mRNA expression in various cancer patients using cBioPortal.
- C Heatmap analysis using cBioPortal showing Skp2 and YAP target gene sets in kidney renal clear cell carcinoma and brain lower-grade glioma.

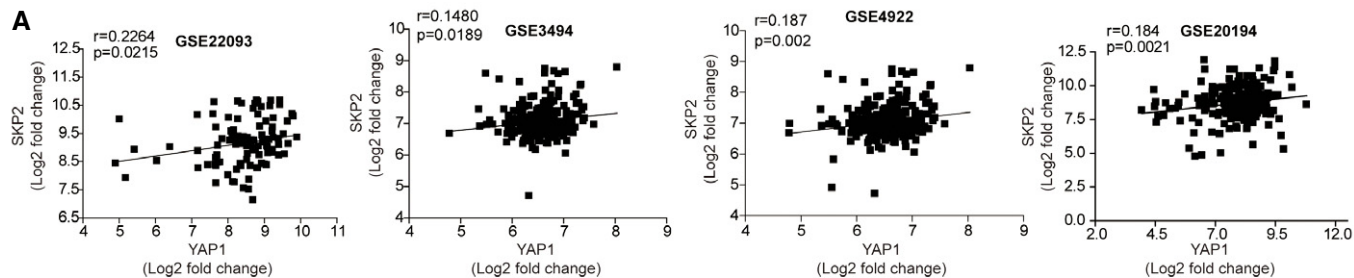

**B**

| www.cbioportal.org                    |                               |              |                                                          |
|---------------------------------------|-------------------------------|--------------|----------------------------------------------------------|
| Type of tissue                        | Source                        | # of samples | Tendency towards co-occurrence (mRNA data; YAP1 vs SKP2) |
| Breast invasive carcinoma             | TCGA, Provisional             | 1105         | p-value=0.014                                            |
| Liver Hepatocellular carcinoma        | TCGA, Provisional             | 360          | p-value=0.040                                            |
| Brain Lower Grade Glioma              | TCGA, Provisional             | 530          | p-value<0.001                                            |
| Glioblastoma                          | TCGA, Cell 2013               | 154          | p-value=0.007                                            |
| Stomach Adenocarcinoma                | TCGA, Provisional             | 415          | p-value=0.037                                            |
| Head and Neck Squamous Cell Carcinoma | TCGA, Provisional             | 522          | p-value=0.023                                            |
| Kidney Renal Clear Cell Carcinoma     | TCGA, Provisional             | 534          | p-value<0.001                                            |
| Kidney Renal Papillary Cell Carcinoma | TCGA, Provisional             | 291          | p-value=0.029                                            |
| Lung Adenocarcinoma                   | TCGA, Provisional             | 517          | p-value=0.026                                            |
| Lung Squamous Cell Carcinoma          | TCGA, Provisional             | 501          | p-value=0.042                                            |
| Pancreatic Adenocarcinoma             | TCGA, Provisional             | 179          | p-value=0.012                                            |
| Prostate Adenocarcinoma               | Broad/Cornell, Nat Genet 2012 | 31           | p-value=0.032                                            |
| Prostate Adenocarcinoma               | MSKCC, Cancer Cell 2010       | 216          | p-value<0.001                                            |
| Sarcoma                               | MSKCC/Broad, Nat Genet 2010   | 207          | p-value=0.017                                            |

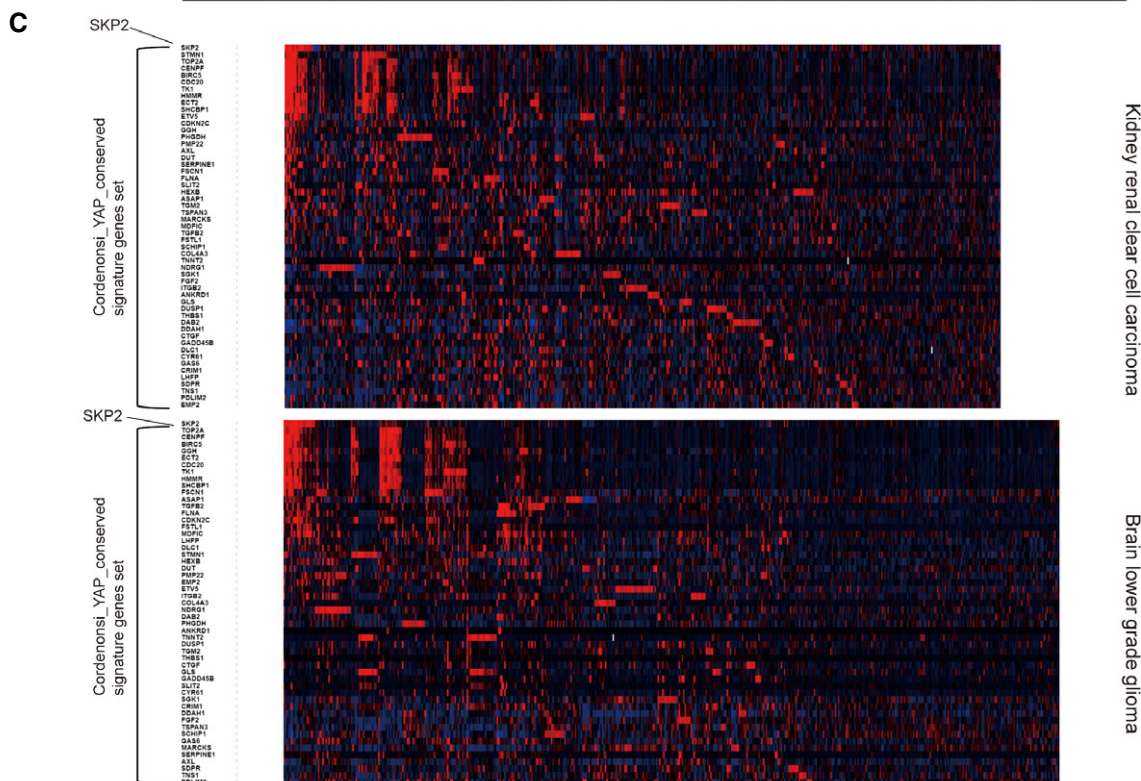

Figure EV5.
